# Supplementary figures and images for: Biocatalytic racemisation of α-hydroxycarboxylic acids at physiological conditions
Source: Royal Society of Chemistry journal article supplement (doi:10.1039/b418786e), 2005-01-01

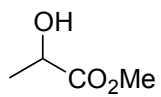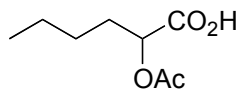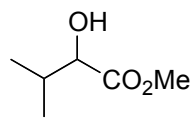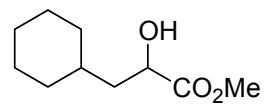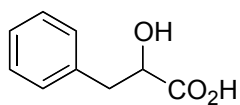

**5**

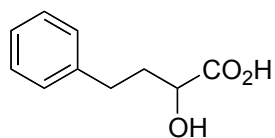

**6**

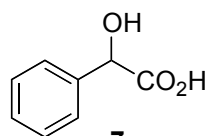

**7**

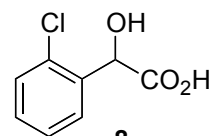

**8**

Supplement: b418786e-2.pdf [file b418786e-2.pdf]
